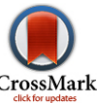

## Correction

# Correction: p53-Independent Cell Cycle and Erythroid Differentiation Defects in Murine Embryonic Stem Cells Haploinsufficient for Diamond Blackfan Anemia-Proteins: RPS19 versus RPL5

The *PLOS ONE* Staff

## Notice of Republication

This article was republished on April 10, 2014, to correct formatting errors that were introduced during the typesetting process. The publisher apologizes for the errors. Please download this article again to view the correct version. The originally published, uncorrected article and the republished, corrected article are provided here for reference.

## Supporting Information

**File S1.** Originally published, uncorrected article.  
(PDF)

**File S2.** Republished, corrected article.  
(PDF)

## Reference

1. Singh SA, Goldberg TA, Henson AL, Husain-Krautter S, Nihrane A, et al. (2014) p53-Independent Cell Cycle and Erythroid Differentiation Defects in Murine Embryonic Stem Cells Haploinsufficient for Diamond Blackfan Anemia-Proteins: RPS19 versus RPL5. *PLoS ONE* 9(2): e89098. doi:10.1371/journal.pone.0089098

**Citation:** The *PLOS ONE* Staff (2014) Correction: p53-Independent Cell Cycle and Erythroid Differentiation Defects in Murine Embryonic Stem Cells Haploinsufficient for Diamond Blackfan Anemia-Proteins: RPS19 versus RPL5. *PLoS ONE* 9(4): e96689. doi:10.1371/journal.pone.0096689

**Published:** April 30, 2014

**Copyright:** © 2014 The *PLOS ONE* Staff. This is an open-access article distributed under the terms of the Creative Commons Attribution License, which permits unrestricted use, distribution, and reproduction in any medium, provided the original author and source are credited.
